# Supplementary material
Source: publisher figshare collection journal article supplement (https://diabetesjournals.figshare.com/articles/dataset/_/13089923)
Supplement: Supplementary file 1 [file 1]

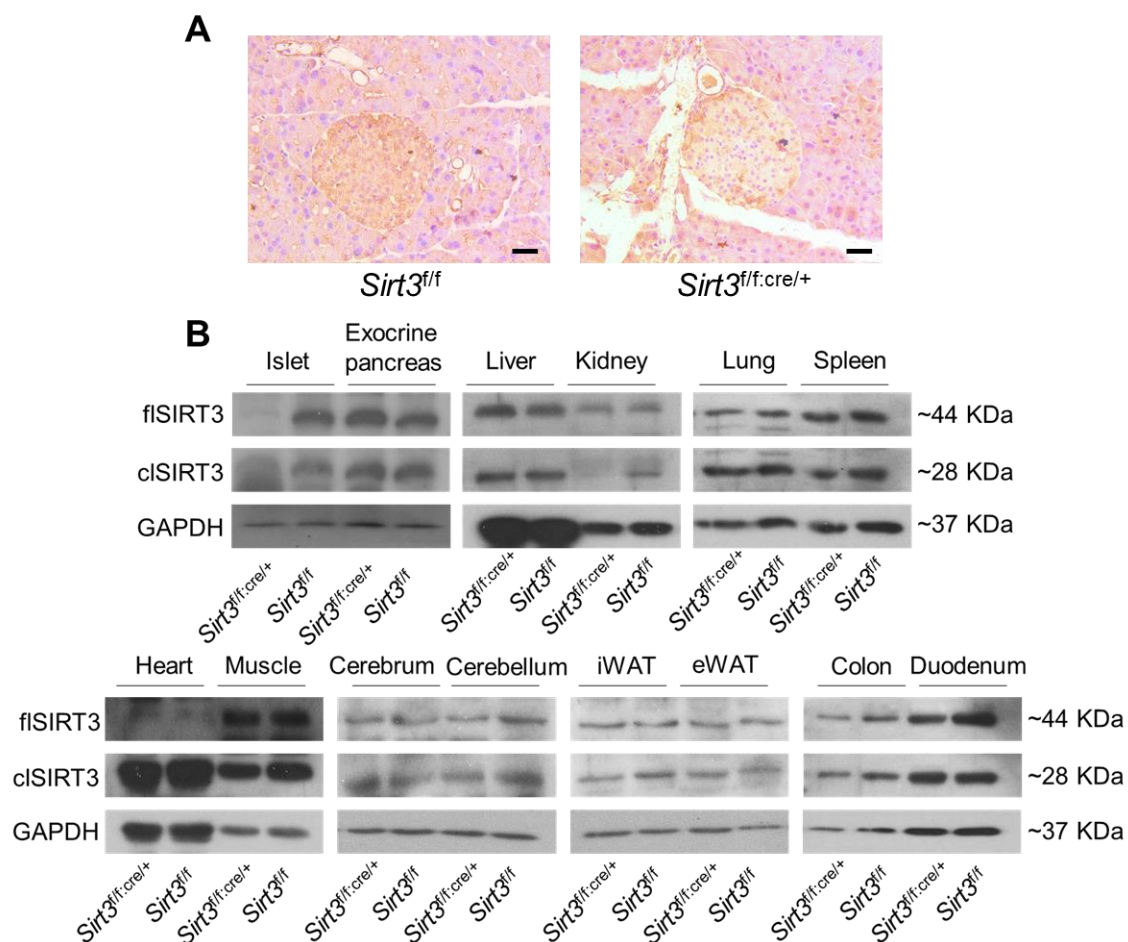

**Supplementary Fig. 1 Pancreatic beta cell selective deletion of *Sirt3*. A:**

Immunohistochemistry staining of SIRT3 in islets from *Sirt3<sup>fl/fl;Cre/+</sup>* and *Sirt3<sup>fl/fl</sup>* mice (scale bar, 100  $\mu$ m). **B:** Representative western blot data of SIRT3 protein expressions in several organs and tissues from *Sirt3<sup>fl/fl;Cre/+</sup>* and *Sirt3<sup>fl/fl</sup>* mice, n=3.

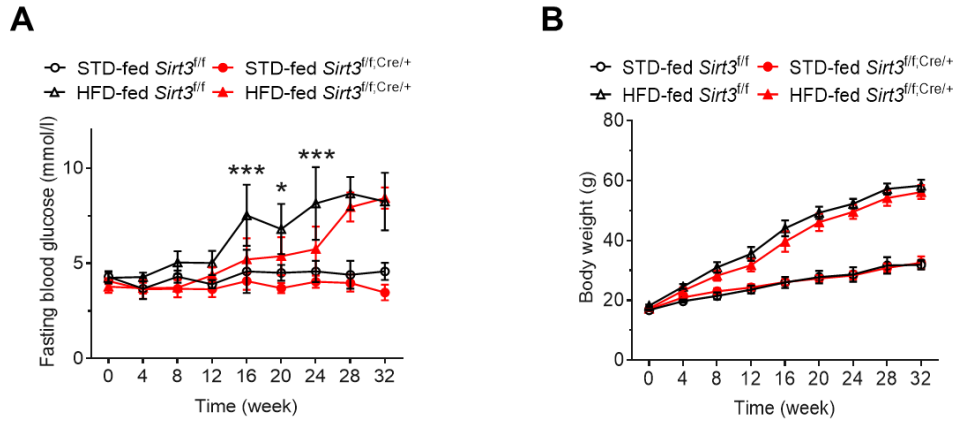

**Supplementary Fig. 2** HFD-fed *Sirt3*<sup>fl/fl;Cre/+</sup> mice have lower fasting blood glucose than HFD-fed *Sirt3*<sup>fl/fl</sup>, despite no significant difference in body weight. **A:** The fasting blood glucose was measured every 4 weeks around 9:00–10:00 am after overnight fasting. **B:** The body weight was monitored every 4 weeks. Data are presented as mean-SD. \*HFD-fed *Sirt3*<sup>fl/fl;Cre/+</sup> vs. HFD-fed *Sirt3*<sup>fl/fl</sup>; \* $p < 0.05$ , \* $p < 0.01$ , \* $p < 0.001$ ; HFD, high fat diet; STD, standard diet,  $n=5$ .

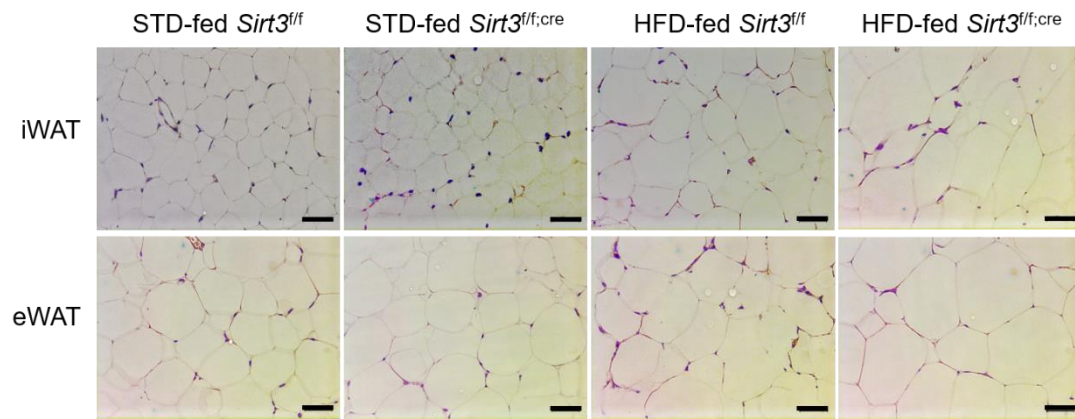

**Supplementary Fig. 3** Adipose cell size was increased in HFD-fed *Sirt3<sup>fl/f;Cre/+</sup>* mice compared to HFD-fed *Sirt3<sup>fl/f</sup>*. H&E staining was conducted on iWAT and eWAT from four groups of mice. eWAT: epididymal adipose tissue; high fat diet; iWAT: inguinal adipose tissue; STD, standard diet, n=3.

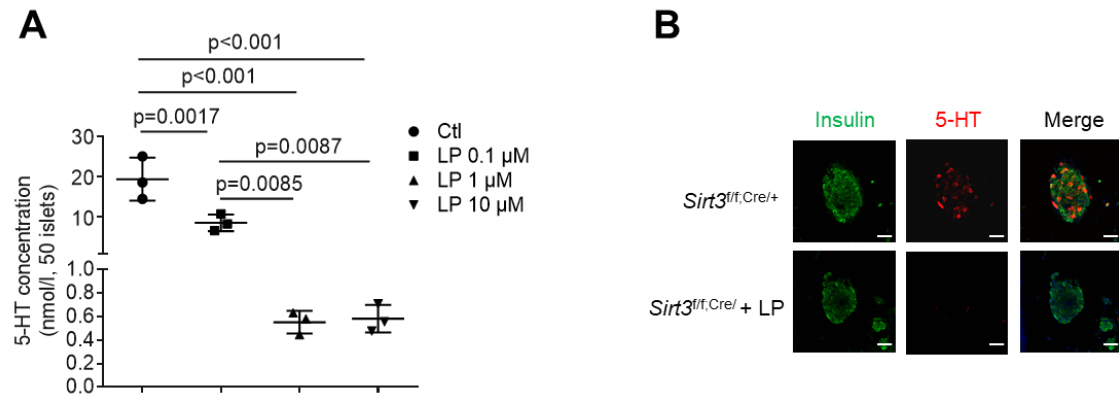

**Supplementary Fig. 4** TPH1 inhibitor dose dependently inhibit 5-HT synthesis. **A**: 5-HT concentration in 50 pancreatic islets from *Sirt3<sup>fl/f; Cre/+</sup>* mice after different concentration of LP treatment for 48 h. **B**: Immunofluorescence staining of insulin and 5-HT in pancreatic islets from *Sirt3<sup>fl/f; Cre/+</sup>* mice with or without treatment of 10 μM LP for 48 h. (scale bar, 100 μm, green: Insulin, red: 5-HT, blue: DAPI). Data are presented as Mean-SD. LP, LP533401, tryptophan hydroxylase 1 (TPH1) inhibitor, n=3.

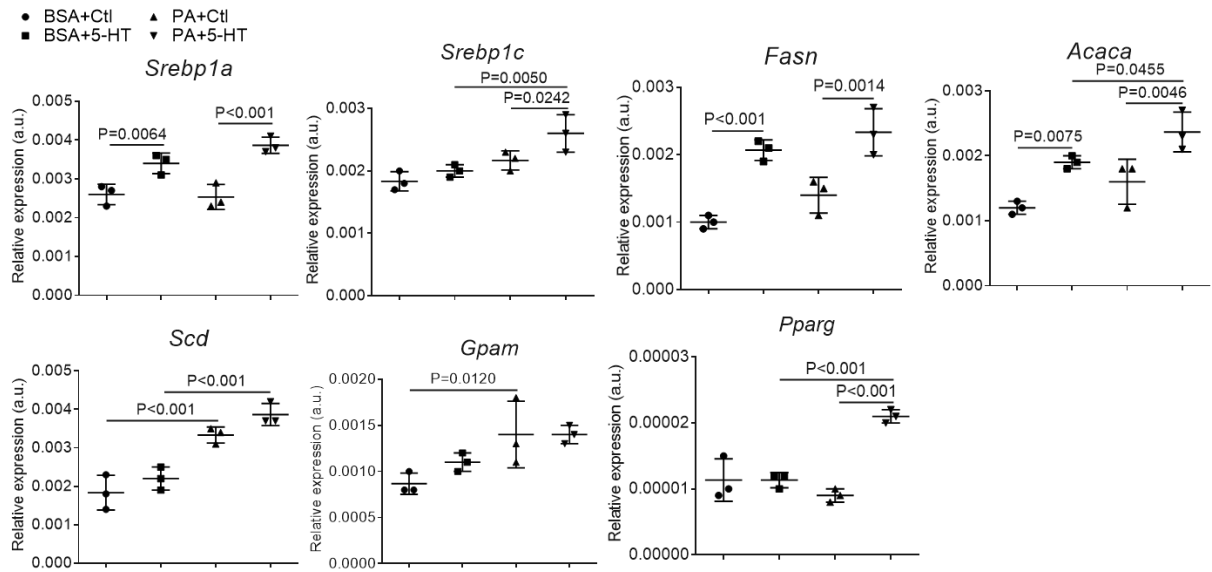

**Supplementary Fig. 5** Lipogenic genes were elevated by 5-HT in HepG2 cells. Data are presented as Mean-SD. Acaca, acetyl-CoA carboxylase; BSA, bovine serum albumin, which is used to dissolve PA; Fasn, fatty acid synthase; Gpam, Glycerol-3-phosphate acyltransferase 1; PA, palmitic acid; 5-HT, 5-hydroxytryptamine; Pparg, peroxisome proliferator-activated receptor gamma; Scd, steroyl CoA desaturase-1; Srebp1, sterol regulatory element-binding protein 1, n=3.

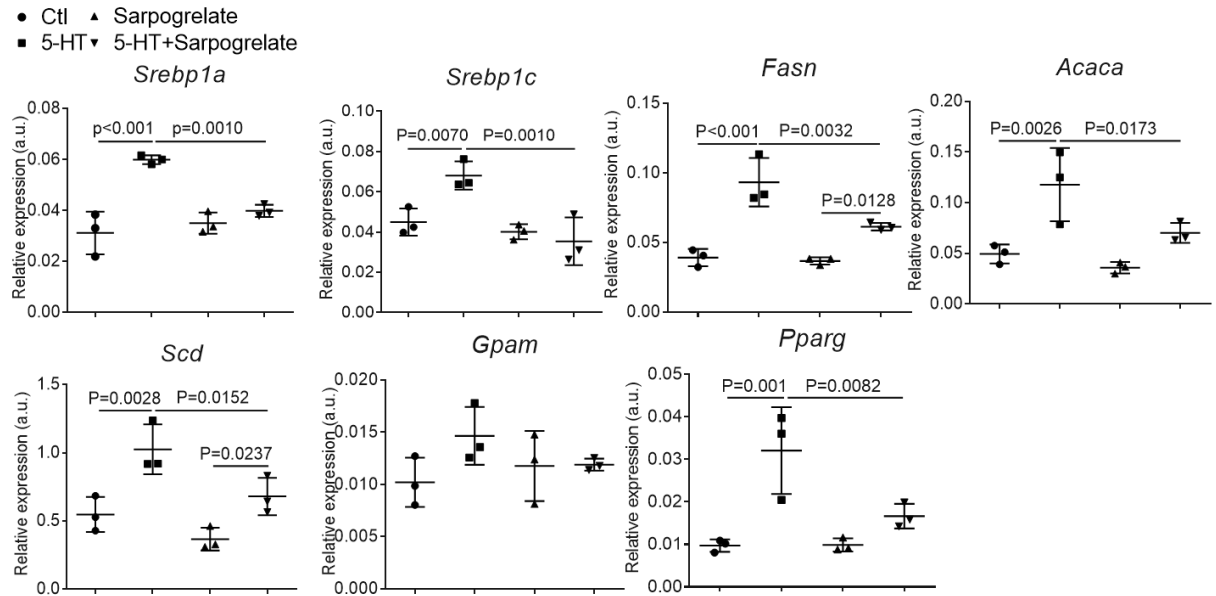

**Supplementary Fig. 6 Lipogenic effect of 5-HT was counteracted by HTR2A antagonist in HepG2 cells. Data are presented as Mean-SD. *Acaca*, acetyl-CoA carboxylase; Anti-HTR2A, 5-HT receptor 2A antagonist; BSA, bovine serum albumin, which is used to dissolve PA; *Fasn*, fatty acid synthase; *Gpam*, Glycerol-3-phosphate acyltransferase 1; PA, palmitic acid; 5-HT, 5-hydroxytryptamine; *Pparg*, peroxisome proliferator-activated receptor gamma; *Scd*, steroyl CoA desaturase-1; *Srebp1*, sterol regulatory element-binding protein 1,  $n=3$ .**

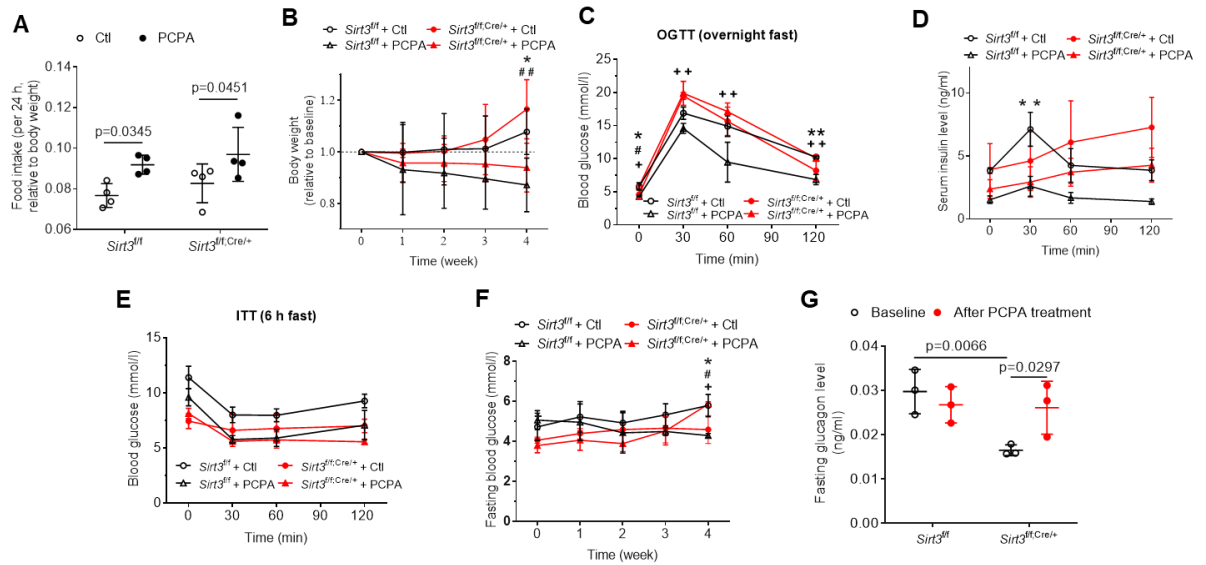

**Supplementary Fig. 7 Different role of PCPA in glucose homeostasis of *Sirt3<sup>fl/f</sup>;Cre/+* and *Sirt3<sup>fl/f</sup>* mice.** 20 weeks high fat diet fed *Sirt3<sup>fl/f</sup>;Cre/+* and *Sirt3<sup>fl/f</sup>* mice were treated with TPH1 inhibitor, PCPA for four weeks and sacrificed. **A:** 24h food intake was measured (n=4). **B:** Body weight relative to baseline was calculated every 4 weeks (n=3). **C:** OGTT was performed before sacrifice (n=3). **D:** During OGTT, blood samples were collected at each time point, serum was extracted from blood samples for insulin level measurement (n=3). **E:** ITT was performed 1 week before OGTT (n=3). **F:** The fasting blood glucose was measured every 4 weeks around 9:00–10:00 am after overnight fasting (n=3). **G:** The fasting glucagon level was measured at baseline and after 4 weeks of treatment (n=3). Data are presented as mean-SD. \* *Sirt3<sup>fl/f</sup>* + Ctl vs. *Sirt3<sup>fl/f</sup>* + PCPA, # *Sirt3<sup>fl/f</sup>;Cre/+* + Ctl vs. *Sirt3<sup>fl/f</sup>;Cre/+* + PCPA, + *Sirt3<sup>fl/f</sup>* + PCPA vs. *Sirt3<sup>fl/f;Cre/+</sup>* + PCPA; \**p*, #*p* or +*p* < 0.05, \**p*, #*p* or ++*p* < 0.01, \*\*\**p*, ###*p* or +++*p* < 0.001. PCPA, p-chlorophenylalanine.

Supplementary Table S1 QC and statistics of RNA-Seq

| Sample name                               | Raw reads | Clean reads | raw bases | clean bases | Error rate(%) | Q20(%) | Q30(%) | GC content(%) |
|-------------------------------------------|-----------|-------------|-----------|-------------|---------------|--------|--------|---------------|
| STD-fed <i>Sirt3<sup>flf1</sup></i>       | 51393012  | 48708370    | 7.7G      | 7.3G        | 0.01          | 97.49  | 93.54  | 52.72         |
| STD-fed <i>Sirt3<sup>flf2</sup></i>       | 40496700  | 38410428    | 6.1G      | 5.8G        | 0.01          | 97.55  | 93.65  | 52.83         |
| STD-fed <i>Sirt3<sup>flf3</sup></i>       | 45253246  | 42708532    | 6.8G      | 6.4G        | 0.01          | 97.53  | 93.58  | 53.25         |
| STD-fed <i>Sirt3<sup>flf;Cre/+1</sup></i> | 43710938  | 41260142    | 6.6G      | 6.2G        | 0.01          | 97.51  | 93.56  | 52.41         |
| STD-fed <i>Sirt3<sup>flf;Cre/+2</sup></i> | 42707530  | 40169312    | 6.4G      | 6G          | 0.01          | 97.67  | 93.88  | 53.15         |
| STD-fed <i>Sirt3<sup>flf;Cre/+3</sup></i> | 45398442  | 42798032    | 6.8G      | 6.4G        | 0.01          | 97.61  | 93.76  | 52.16         |
| HFD-fed <i>Sirt3<sup>flf1</sup></i>       | 51047030  | 48150600    | 7.7G      | 7.2G        | 0.01          | 97.6   | 93.75  | 53.43         |
| HFD-fed <i>Sirt3<sup>flf2</sup></i>       | 40672074  | 38520994    | 6.1G      | 5.8G        | 0.01          | 97.49  | 93.47  | 53.23         |
| HFD-fed <i>Sirt3<sup>flf3</sup></i>       | 43137038  | 40666922    | 6.5G      | 6.1G        | 0.01          | 97.5   | 93.5   | 52.86         |
| HFD-fed <i>Sirt3<sup>flf;Cre/+1</sup></i> | 43735732  | 41027742    | 6.6G      | 6.2G        | 0.01          | 97.6   | 93.72  | 53.09         |
| HFD-fed <i>Sirt3<sup>flf;Cre/+2</sup></i> | 40388526  | 37808536    | 6.1G      | 5.7G        | 0.01          | 97.87  | 94.29  | 53.09         |
| HFD-fed <i>Sirt3<sup>flf;Cre/+3</sup></i> | 47990468  | 45104154    | 7.2G      | 6.8G        | 0.01          | 97.48  | 93.49  | 52.74         |

**Supplementary Table S2 The ten most upregulated genes in HFD-fed *Sirt3<sup>fl/f</sup>;Cre/+* vs. HFD-fed *Sirt3<sup>fl/f</sup>***

| NO. | Gene name     | Gene annotation                                              | Log2 fold change | P-value  |
|-----|---------------|--------------------------------------------------------------|------------------|----------|
| 1   | <i>Tph1</i>   | tryptophan hydroxylase 1                                     | 9.725            | 4.62E-51 |
| 2   | <i>Gbp11</i>  | guanylate binding protein 11                                 | 8.901            | 1.58E-28 |
| 3   | <i>Prok1</i>  | prokineticin 1                                               | 8.793            | 1.40E-37 |
| 4   | <i>Lrrc55</i> | leucine rich repeat containing 55                            | 8.670            | 3.97E-51 |
| 5   | <i>Syt10</i>  | synaptotagmin X                                              | 8.433            | 1.37E-12 |
| 6   | <i>Gad2</i>   | glutamic acid decarboxylase 2                                | 8.326            | 9.22E-04 |
| 7   | <i>Kcnj5</i>  | potassium inwardly-rectifying channel, subfamily J, member 5 | 7.798            | 8.23E-23 |
| 8   | <i>Sox11</i>  | SRY (sex determining region Y)-box 11                        | 7.287            | 4.09E-13 |
| 9   | <i>Popdc3</i> | popeye domain containing 3                                   | 7.234            | 4.74E-04 |
| 10  | <i>Rph3a</i>  | rabphilin 3A                                                 | 7.033            | 3.98E-39 |

**Supplementary Table S3 The ten most downregulated genes in HFD-fed *Sirt3<sup>fl/f</sup>;Cre/+* vs. HFD-fed *Sirt3<sup>fl/f</sup>***

| NO. | Gene name      | Gene annotation                                              | Log2 fold change | P-value  |
|-----|----------------|--------------------------------------------------------------|------------------|----------|
| 1   | <i>Nrk</i>     | Nik related kinase                                           | -5.119           | 7.87E-05 |
| 2   | <i>Dlgap2</i>  | DLG associated protein 2                                     | -4.049           | 7.00E-03 |
| 3   | <i>Rprml</i>   | reprimin-like                                                | -3.432           | 5.81E-07 |
| 4   | <i>Tmem179</i> | transmembrane protein 179                                    | -3.342           | 1.21E-02 |
| 5   | <i>Cplx3</i>   | complexin 3                                                  | -3.250           | 4.57E-02 |
| 6   | <i>B3gat1</i>  | beta-1,3-glucuronyltransferase 1 (glucuronosyltransferase P) | -2.645           | 2.86E-03 |
| 7   | <i>Lmx1b</i>   | LIM homeobox transcription factor 1 beta                     | -2.609           | 1.03E-07 |
| 8   | <i>Greb1l</i>  | growth regulation by estrogen in breast cancer-like          | -2.553           | 5.69E-03 |
| 9   | <i>Sgcz</i>    | sarcoglycan zeta                                             | -2.509           | 2.96E-04 |
| 10  | <i>Dok7</i>    | docking protein 7                                            | -2.401           | 2.21E-04 |

**Supplementary Table S4 List of mouse primers used for RT-PCR**

| Gene name            | Forward primer (5' to 3') | Reverse primer (5' to 3')    |
|----------------------|---------------------------|------------------------------|
| <i>Acaca</i>         | CTCCCGATTGATAATTGGGTCTG   | TCGACCTTGTTTTACTAGGTGC       |
| <i>Actb</i>          | GGCTGTATTCCCCTCCATCG      | CCAGTTGGTAACAATGCCATGT       |
| <i>Cd36</i>          | GTTATTGGTGCAGTCCTGGC      | GGTGCCTGTTTTAACCCAGT         |
| <i>Cpt1a</i>         | GGCATAAACGCAGAGCATTCTG    | CAGTGCCATCCTCTGAGTAGC        |
| <i>Fasn</i>          | GGAGGTGGTGATAGCCGGTAT     | TGGGTAATCCATAGAGCCAG         |
| <i>Gck</i>           | CCAAGCACCAAGCGGTATCA      | GTCAGTGGGTGGACTTCTCT         |
| <i>Glut1</i>         | TGCAGTTCGGCTATAACACT      | GTAGCGGTGGTTCCATGTTT         |
| <i>Glut2</i>         | TCAGAAGACAAGATCACCAGA     | GCTGGTGTGACTGTAAGTGGG        |
| <i>Gpam</i>          | ACCAGCGATCCTTCCTTCAA      | AATGTGCTCAGCCAGGTTTG         |
| <i>G6p</i>           | CGACTCGCTATCTCCAAGTGA     | GTTGAACCAGTCTCCGACCA         |
| <i>Pepck</i>         | ATCTTTGGTGGCCGTAGACCT     | CCGAAGTTGTAGCCGAAGAA         |
| <i>Pfk</i>           | AACCAGTCTGTGAGGCTACC      | GTCAAACCTCTCCTCGTCCA         |
| <i>Pk</i>            | TGAAAGCTTTGCAACCTCCC      | ATTCCACCTCCGACTCTGG          |
| <i>Ppara</i>         | AAGGGCTTCTTTGGCGAAC       | TGACCTTGTTTCATGTTGAAGTTCTTCA |
| <i>Pparg</i>         | GGAAGACCACTCGCATTCTT      | GTAATCAGCAACCATTGGGTCA       |
| <i>Tph1</i>          | ACGTTCTCTCTTGGCTGAA       | AAGGGCTTGACTTTGGCATG         |
| <i>Tph2</i>          | GAATGAAGTTGGTGGGCTGG      | TTCCTCCGTCCAAATGCTCT         |
| <i>Tph1 promoter</i> | ACGTGCTACTGACATTC CCT     | TGAGCTTCATCCTGGAAAGGT        |
| <i>Tph2 promoter</i> | ACGGCTGTTTTGTTGCAAGA      | AGCTTGGGGTT ATCTGTGCT        |
| <i>Scd</i>           | CTGTACGGGATCATACTGGTTC    | GCCGTGCCTTGTAAAGTTCTG        |
| <i>Srebp1c</i>       | CGGAAGCTGTCTGGGGTAG       | GTTGTTGATGAGCTGGAGCA         |
| <i>18S rRNA</i>      | GCAATTATCCCCATGAACG       | GGCCTCACTAAACCATCCAA         |

**Supplementary Table S5 List of human primers used for RT-PCR**

| Gene name      | Forward primer (5' to 3') | Reverse primer (5' to 3') |
|----------------|---------------------------|---------------------------|
| <i>Acaca</i>   | TCACACCTGAAGACCTTAAAGCC   | AGCCCACACTGCTTGACTG       |
| <i>Actb</i>    | TGGCACCACACCTTCTACAA      | CCAGAGGCGTACAGGGATAG      |
| <i>Fasn</i>    | CCGAGACACTCGTGGGCTA       | CTTCAGCAGGACATTGATGCC     |
| <i>Gpam</i>    | GACAGTGACTTTGGGGAGGA      | AACAAAGATGGCAGCAGAGC      |
| <i>Pparg</i>   | ACAGATCCAGTGGTTGCAGA      | ATGAGGGAGTTGGAAGGCTC      |
| <i>Scd</i>     | CCCCTACGGCTCTTCTGAT       | CTGAAAACCTGTGGTGGGCA      |
| <i>Srebp1a</i> | TCAGCGAGGCGGCTTTGGAGCAG   | CATGTCTTCGATGTCGGTCAG     |
| <i>Srebp1c</i> | CGGAGCCATGGATTGCA         | GGAAGTCACTGTCTTGGTTGTTGA  |

**Supplementary Table S6 List of mouse primers for ChIP**

| Input   | Gene name                      | Forward primer (5' to 3') | Reverse primer (5' to 3') |
|---------|--------------------------------|---------------------------|---------------------------|
| H4K16Ac | <i>Tph1</i><br><i>promoter</i> | ACGTGCTACTGACATTC CCT     | TGAGCTTCATCCTGGAAAGGT     |
| H4K16Ac | <i>Tph2</i><br><i>promoter</i> | ACGGCTGTTTTGTTGCAAGA      | AGCTTGGGGTT ATCTGTGCT     |
| CREB    | <i>Tph1</i><br><i>promoter</i> | CCCCTCTCTCTGTTCACA        | CTCTCAAGTAGCTGAAACCACA    |
| CREB    | <i>Tph2</i><br><i>promoter</i> | ACGTCATGCCAGCAGAAAAG      | CAACAAAACAGCCGTCGTCT      |
| STAT5   | <i>Tph1</i><br><i>promoter</i> | ACGTGCTACTGACATTC CCT     | TGAGCTTCATCCTGGAAAGGT     |
| STAT5   | <i>Tph2</i><br><i>promoter</i> | ATTGCTGGGTCTGATCAGGT      | GTGTGTGTGTGACGGCTTT       |
